# Supplementary material for: Photoluminescence of PdS2 and PdSe2 quantum dots
Source: Royal Society of Chemistry journal article supplement (doi:10.1039/c9ra07445g), 2019-01-01
Supplement: c9ra07445g1.pdf [file c9ra07445g1.pdf]

## ELECTRONIC SUPPLEMENTARY INFORMATION (ESI)

### Photoluminescence of PdS<sub>2</sub> and PdSe<sub>2</sub> Quantum Dots

Xinyu Wang<sup>a,b</sup>, Wayesh Qarony<sup>a,b</sup>, Ping Kwong Cheng<sup>a,b</sup>, Mohammad Ismail<sup>a,b</sup> and Yuen Hong Tsang<sup>\*a,b</sup>

<sup>a</sup>The Hong Kong Polytechnic University Shenzhen Research Institute, Shenzhen, Guangdong, China.

<sup>b</sup>Department of Applied Physics and Materials Research Centre, The Hong Kong Polytechnic University, Hung Hom, Kowloon, Hong Kong, China.

\*Corresponding author, Email: [yuen.tsang@polyu.edu.hk](mailto:yuen.tsang@polyu.edu.hk).

#### PtS<sub>2</sub> quantum dots (QDs) characterizations

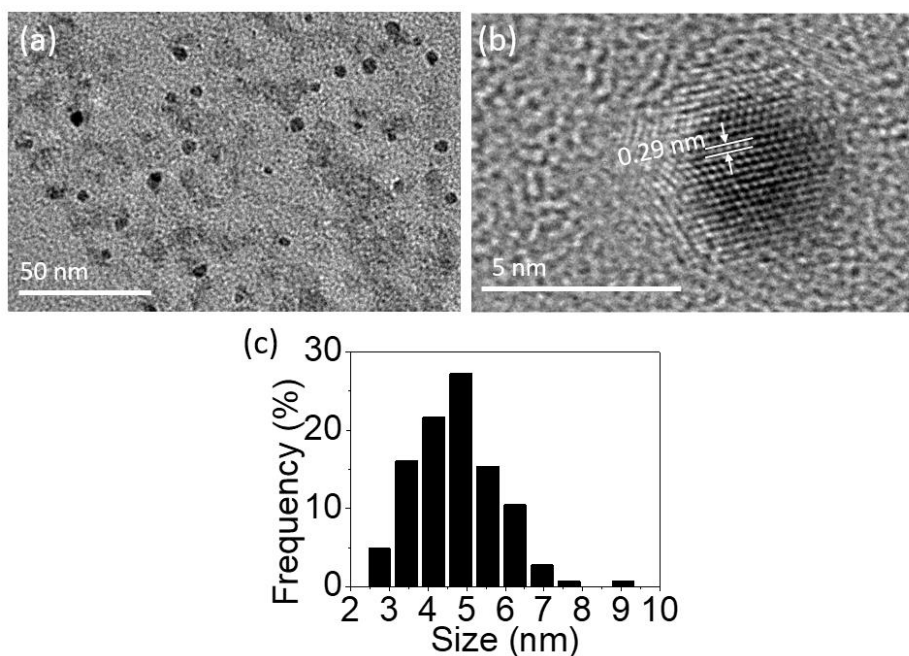

**Fig. S1** (a) TEM image; (b) high resolution TEM image; and size distributions based on multiple images of PtS<sub>2</sub> QD.

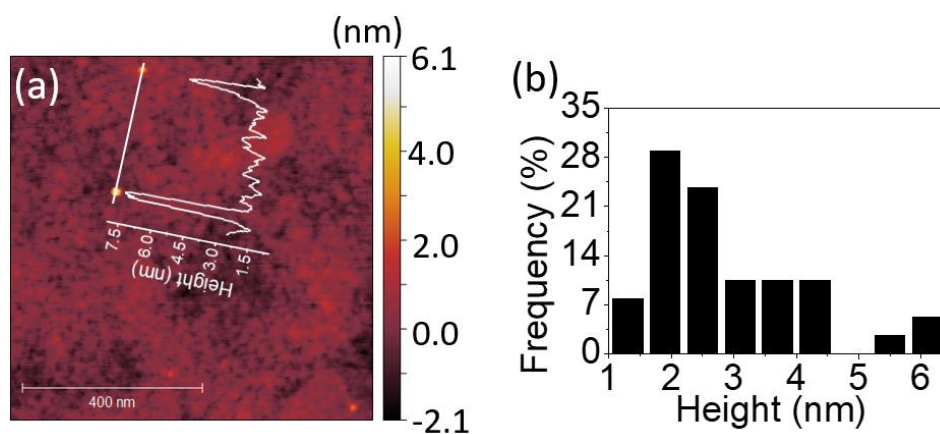

**Fig. S2** (a) Line profile and corresponding AFM image; and (b) height distribution of PtS<sub>2</sub> QDs.

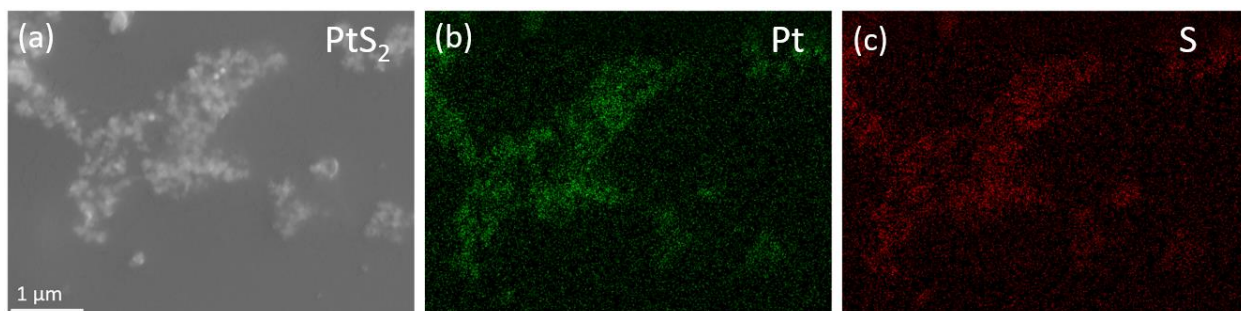

**Fig. S3** (a) SEM image of PtS<sub>2</sub> QDs solution drop-casting on silicon substrate; (b-c) EDX elemental maps of Pt and S elements in (a).

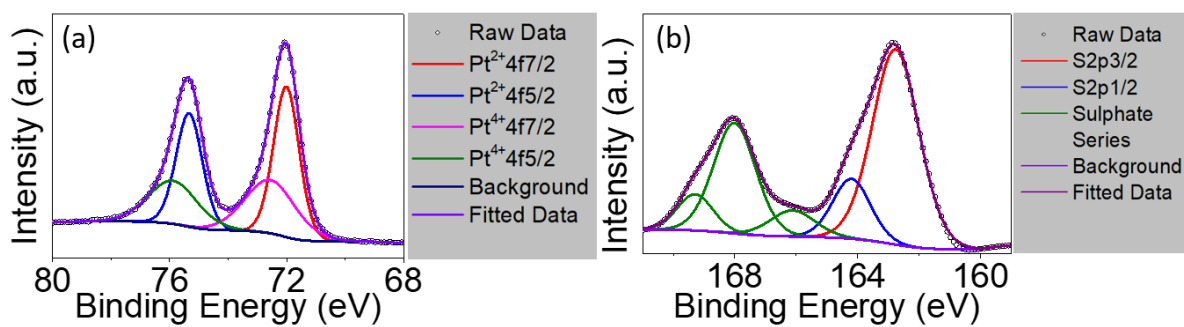

**Fig. S4** High resolution X-ray photoelectron spectra of PtS<sub>2</sub> for (a) Pt4f region and (b) S2p region.

### PtS<sub>2</sub> QDs optical performances and analyzations

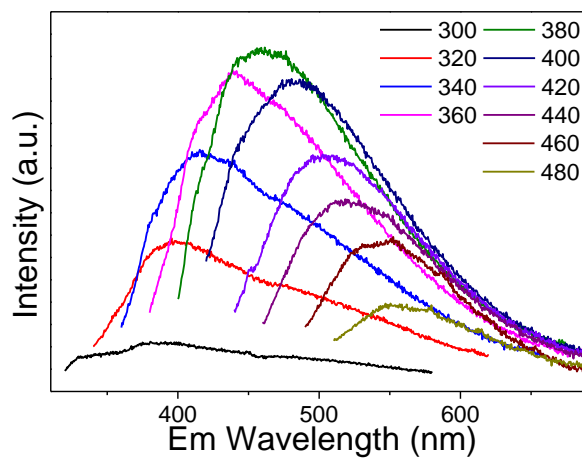

**Fig. S5** Emission (Em) spectra of PtS<sub>2</sub> QDs solution.

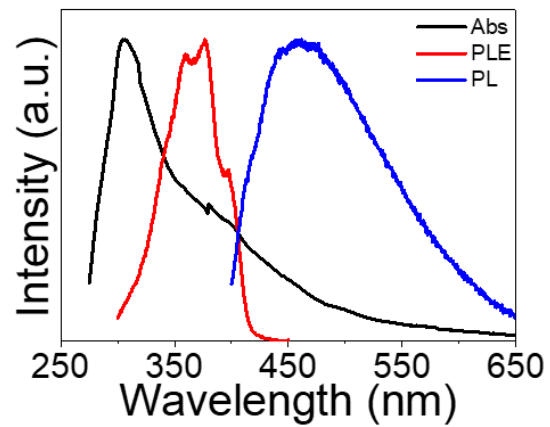

**Fig. S6** Normalized absorption spectra (black curve), and photoluminescence excitation (PLE) spectra (red curve) for PtS<sub>2</sub> QDs solution at 468.5 emission wavelengths, which is observed at the peaks of the corresponding emission spectra (blue curve).
